# Supplementary material for: Distinct codes for environment structure and symmetry in postrhinal and retrosplenial cortices
Source: Springer Nature journal article supplement (doi:10.1038/s41467-024-52315-4), 2024-09-13
Supplement: MOESM1 [file 41467_2024_52315_MOESM1_ESM.pdf]

**A**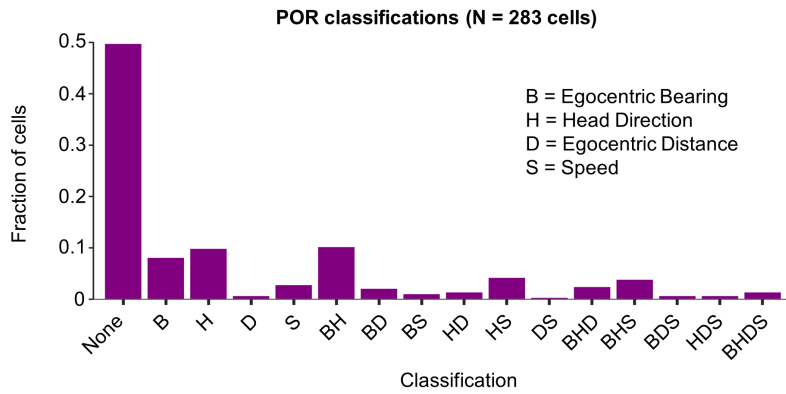**B**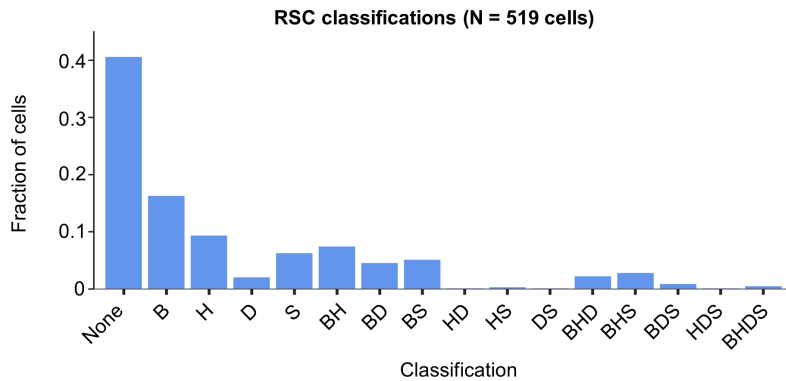**C**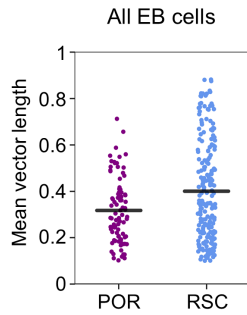**D**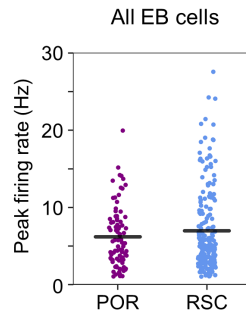**E**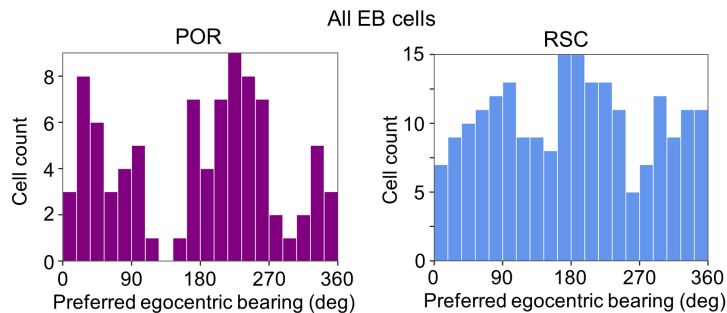

**Supplementary Figure 1. Cell classifications and EB cell baseline tuning properties.** A) Bar plot showing the fraction of POR cells classified as encoding each combination of behavioral variables. B) Same as (A) but for RSC cells. C) Distribution of mean vector lengths for all POR (*left*; N = 85 cells) and RSC (*right*; N = 210 cells) EB cells recorded in the square environment.

D) Same as (C) but for peak firing rates. E) Histogram of preferred egocentric bearings for all POR (*left*; N = 85 cells) and RSC (*right*; N = 210 cells) EB cells recorded in the square environment.



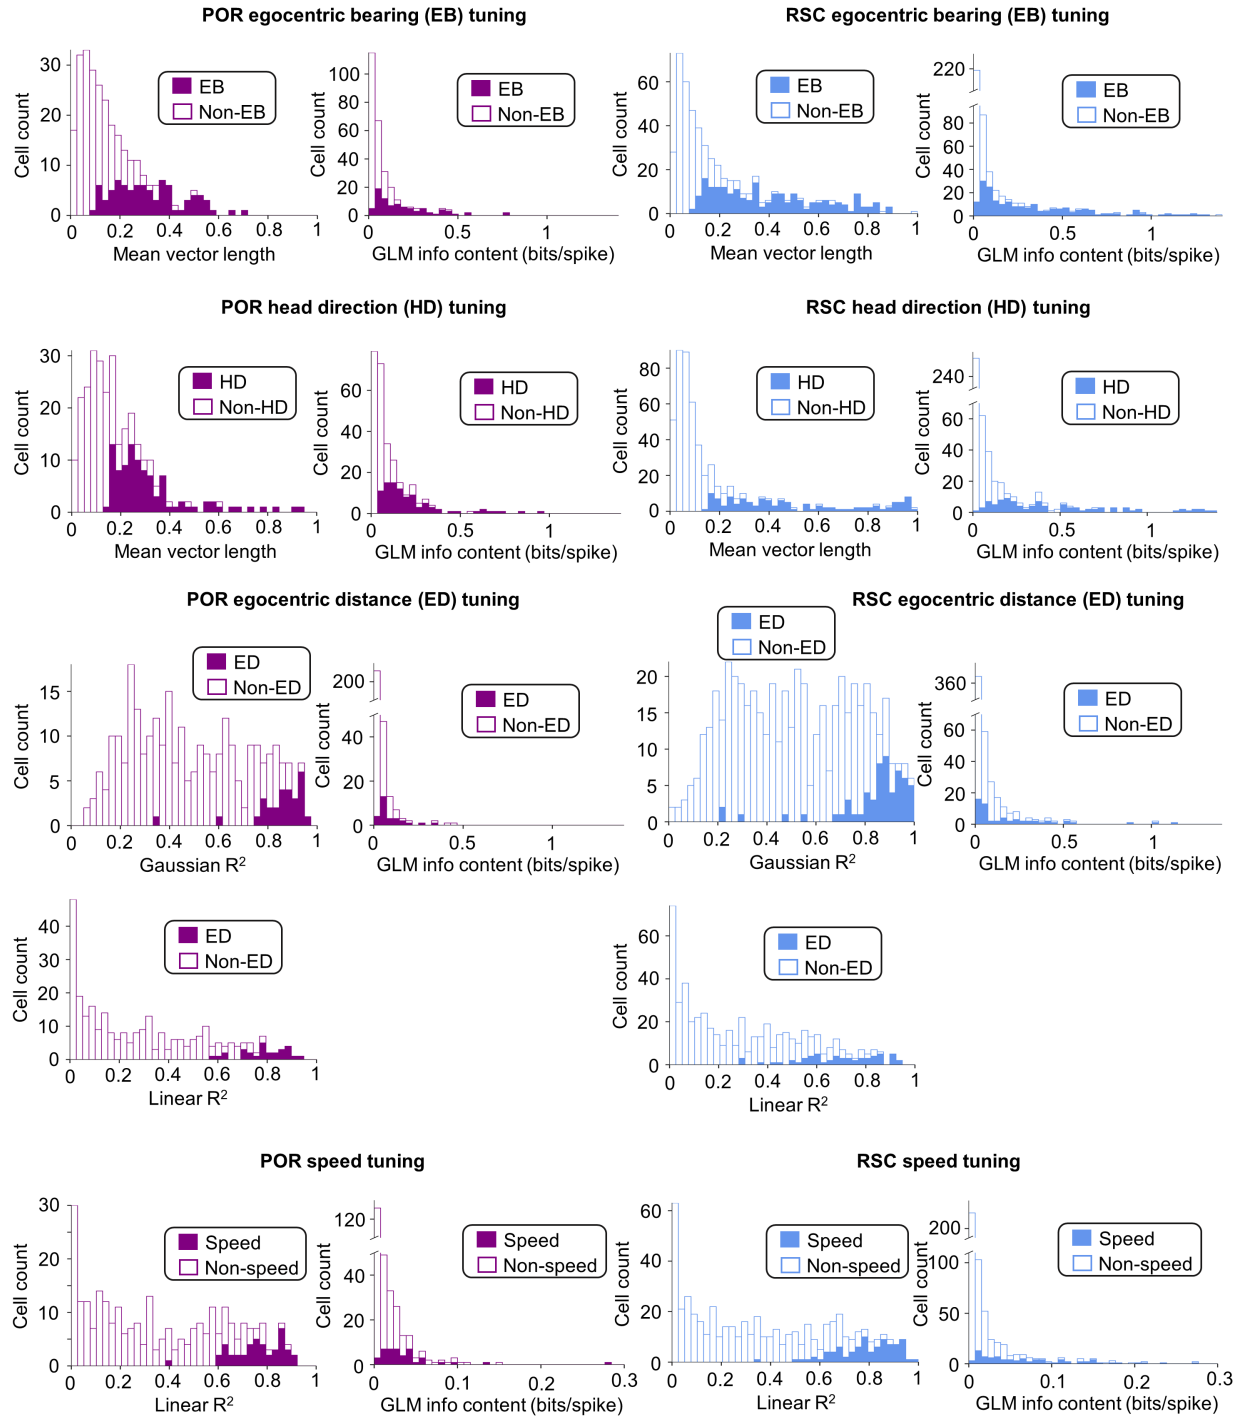

### Supplementary Figure 2. Measures of tuning strength for tuned and non-tuned cells.

Collection of stacked histograms showing tuning strength measures relative to each behavioral variable for POR (*left*) and RSC (*right*) cells classified as being significantly tuned to that variable (filled bars) or not (unfilled bars). Note that cells were classified based on a within-cell shuffle distribution based on one or more tuning measures as well as cross-validation with a GLM (see Methods).

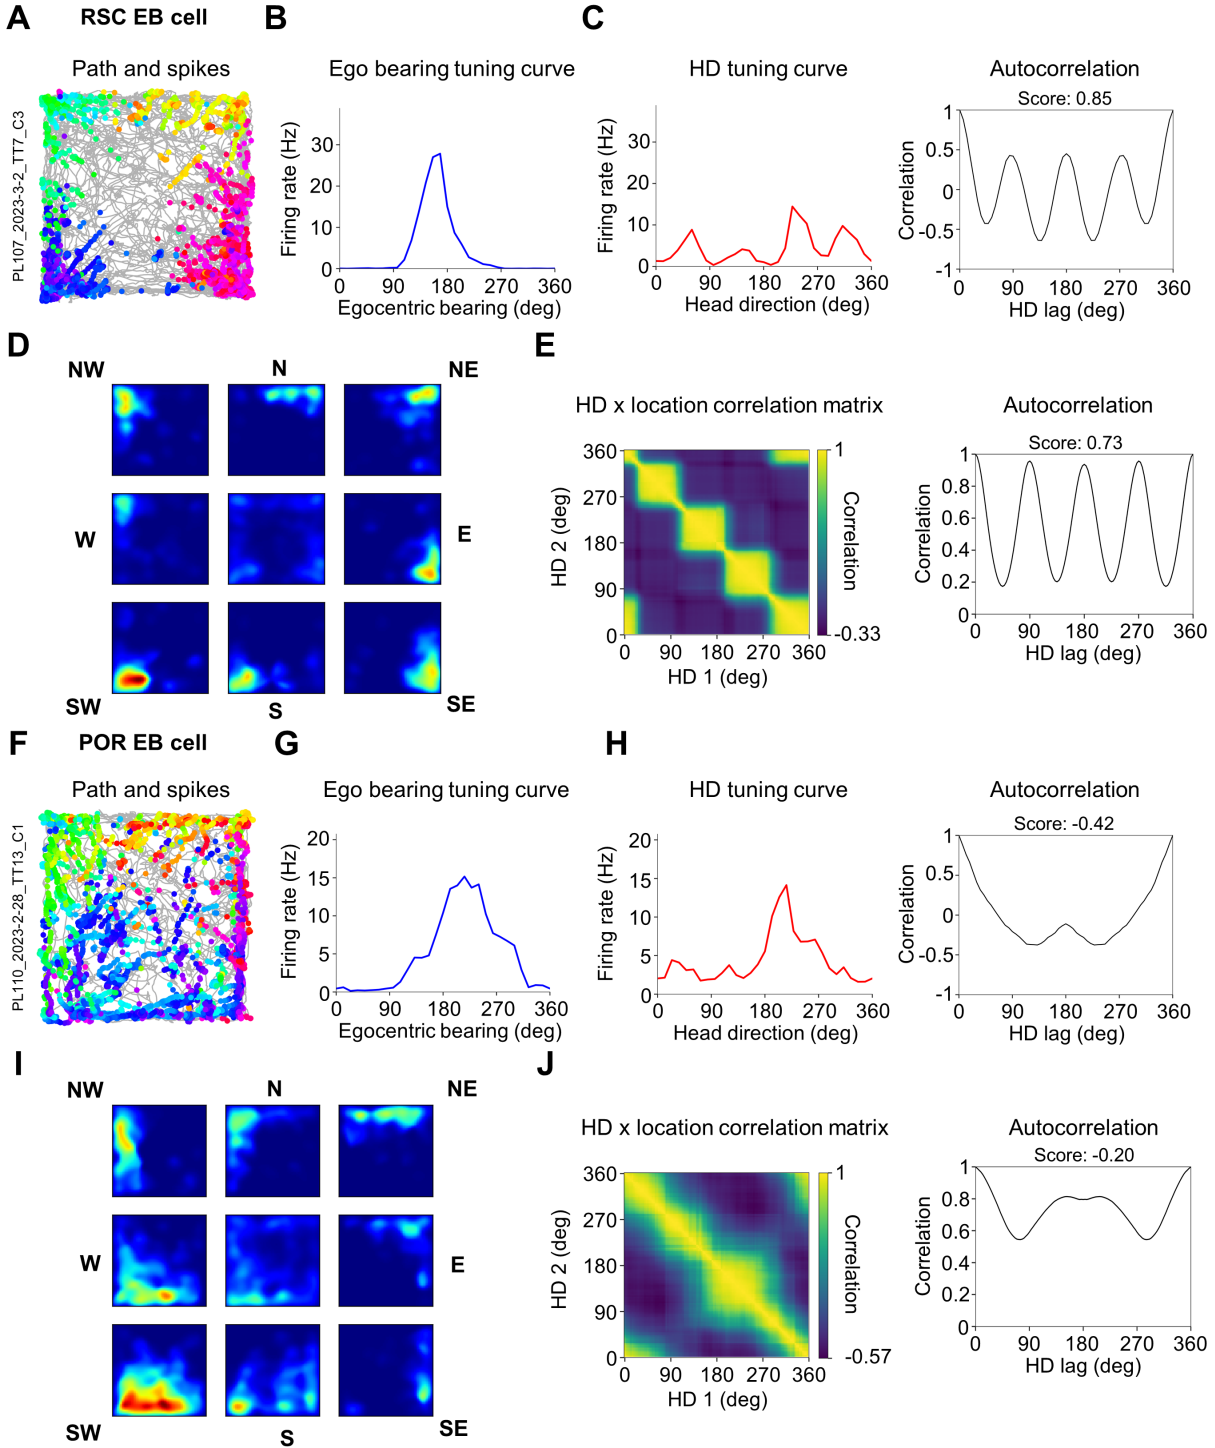

**Supplementary Figure 3. Assessment of HD and HD x location symmetry.** A) Directional spike plot for an RSC EB cell recorded in the square environment. B) Egocentric bearing tuning curve for the cell in (A). C) HD tuning curve (*left*) and associated autocorrelation function (*right*) for the cell in (A). D) Allocentric location firing rate maps for the cell in (A), separated according to the animal's HD (middle plot collapses across all HDs). E) HD x location correlation matrix (*left*) and associated autocorrelation function (*right*) for the cell in (A). F-J

Same as (A-E) but for a POR EB cell. Note that, while the RSC EB cell shows strong four-fold symmetry across all domains, the POR EB cell does not.

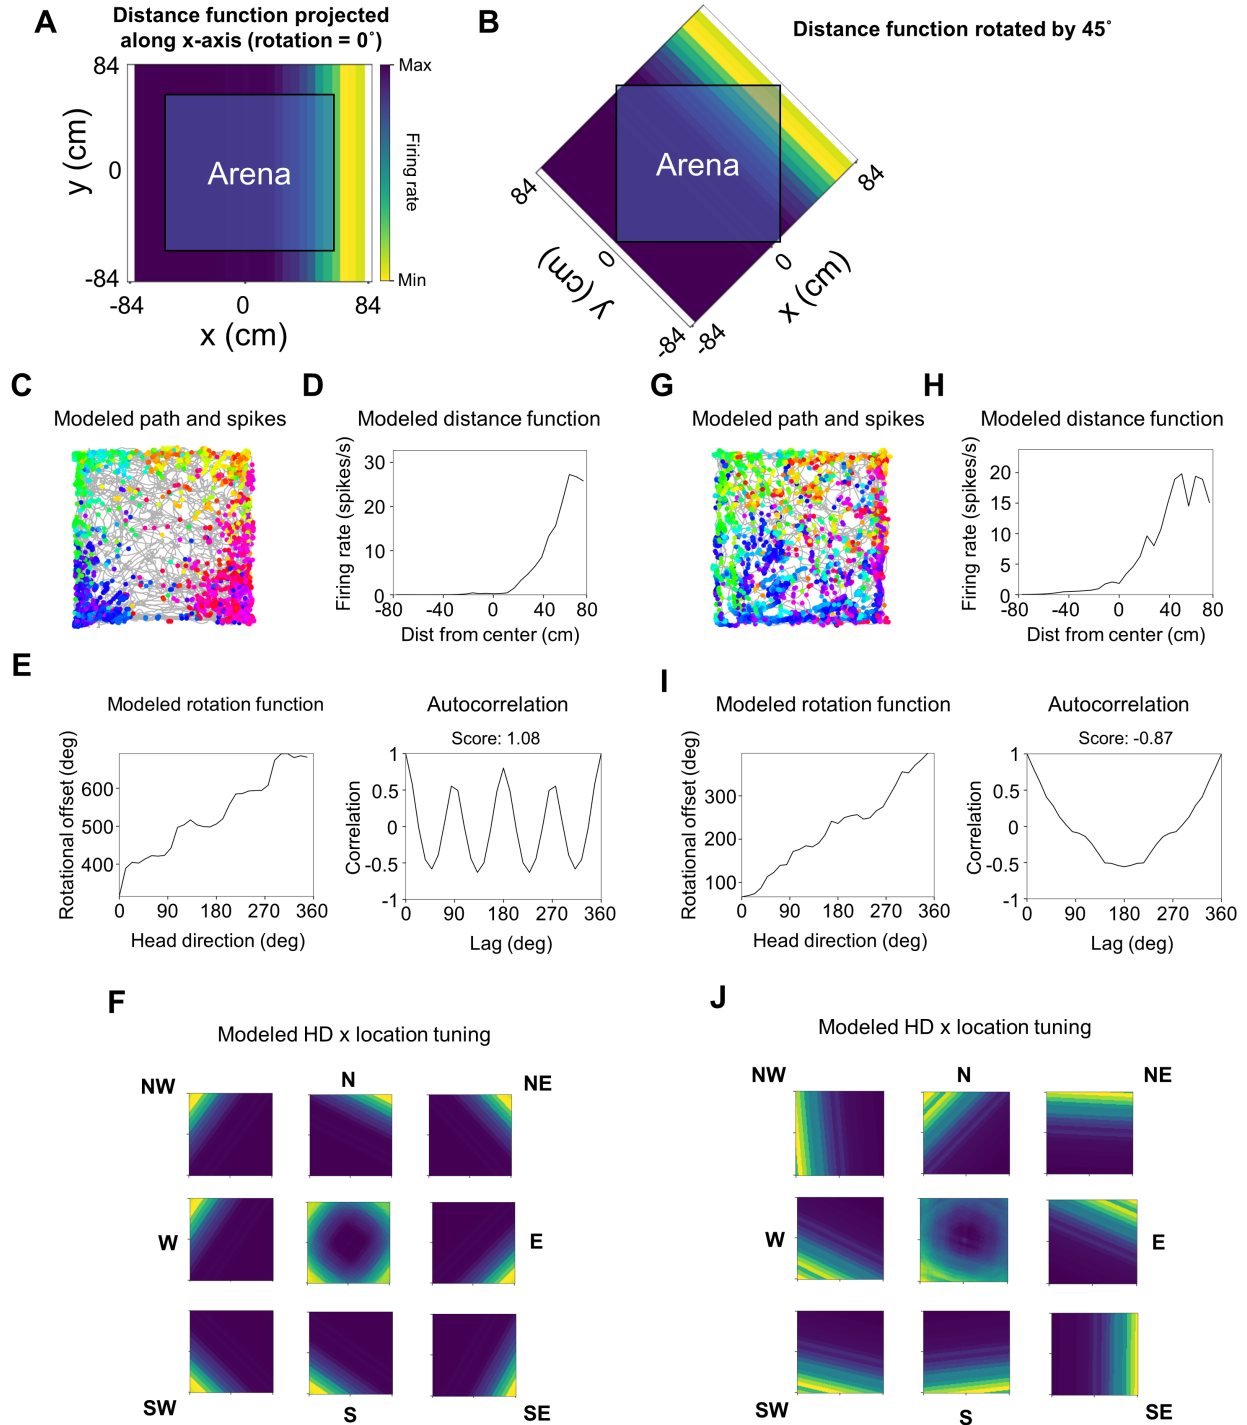

**Supplementary Figure 4. GLM analysis of radial symmetry.** A) Example 2D projection of a 1D distance function across the environment with a rotation of 0°. B) Same 2D projection as (A) but rotated by 45° with respect to the environment. C) Simulated directional spike plot for an RSC EB cell (same as Supplementary Fig. 3A) modeled using the GLM radial symmetry analysis. D) GLM-derived distance function for the cell in (C). E) GLM-derived rotation function (*left*) and associated autocorrelation function (*right*) for the cell in (C). Simulated allocentric location firing rate maps for the cell in (C), separated according to the animal's HD

(middle plot collapses across all HDs). G-J) Same as (C-F) but for a POR EB cell (same cell as Supplementary Fig. 3F). Note the lack of four-fold symmetry in the rotation function compared to the RSC EB cell.

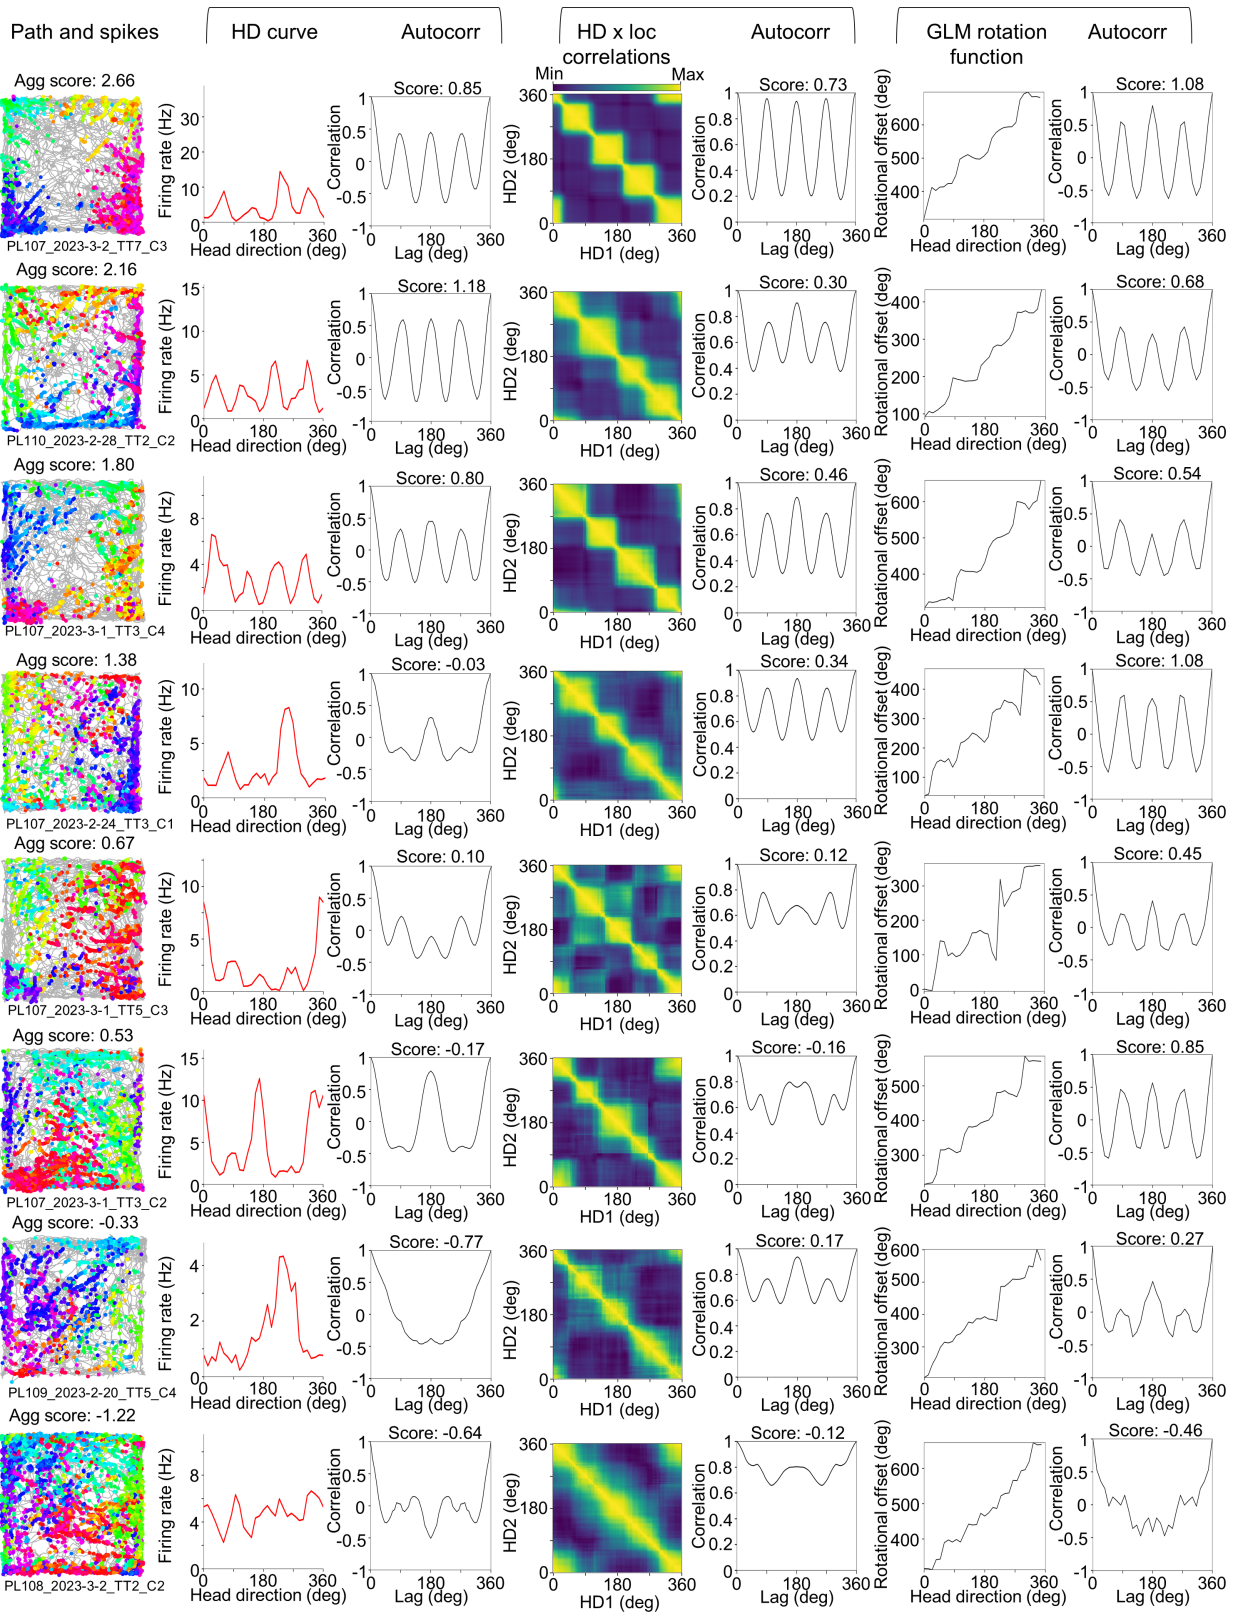

**Supplementary Figure 5. Symmetry analyses for example RSC EB cells.** Directional spike plots, HD tuning curves, HD x location correlation matrices, and GLM-derived rotation functions (along with all associated autocorrelation functions) for ten example RSC EB cells recorded in the square environment. Example cells were selected to illustrate a variety of directional preferences, with cells ordered from highest (*top*) to lowest (*bottom*) four-fold symmetry scores.



Path and spikes

HD curve

Autocorr

HD x loc  
correlations

Autocorr

GLM rotation  
function

Autocorr

Agg score: -0.16

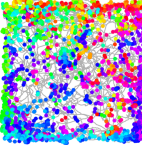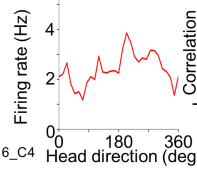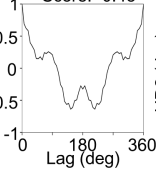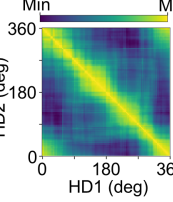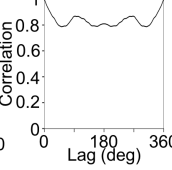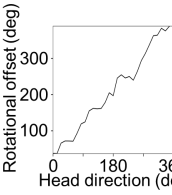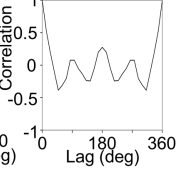

Agg score: -0.91

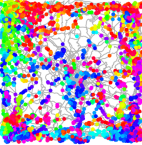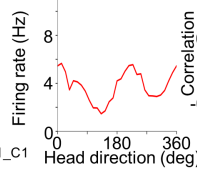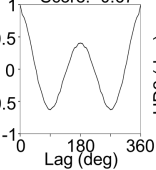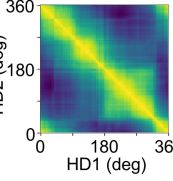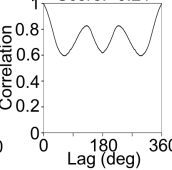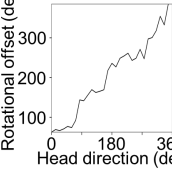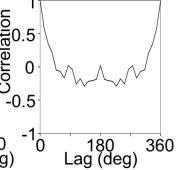

Agg score: -1.00

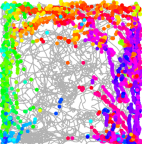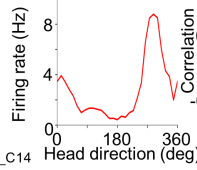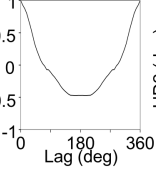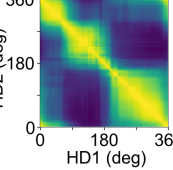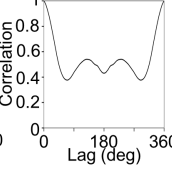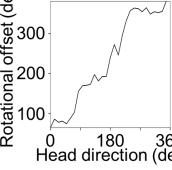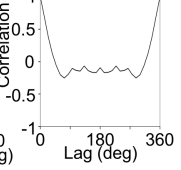

Agg score: -1.06

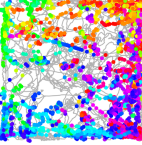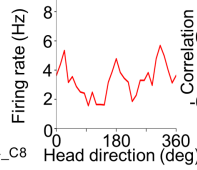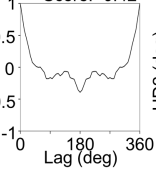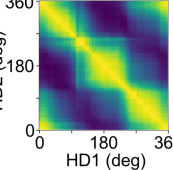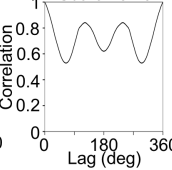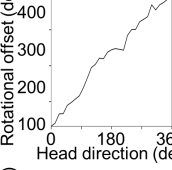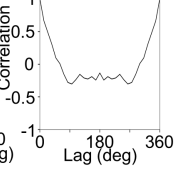

Agg score: -1.29

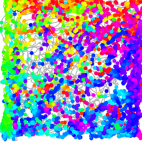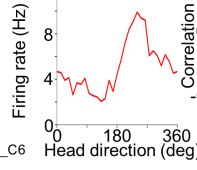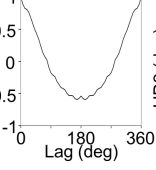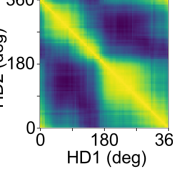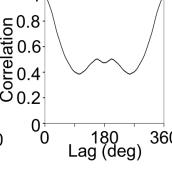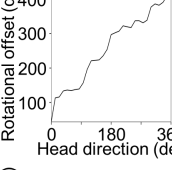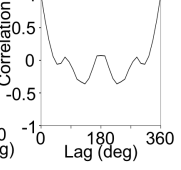

Agg score: -1.32

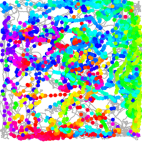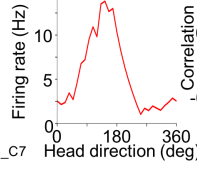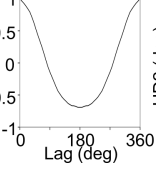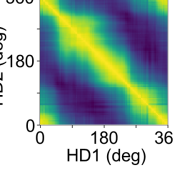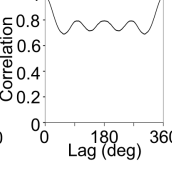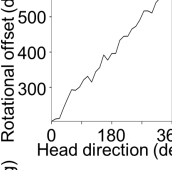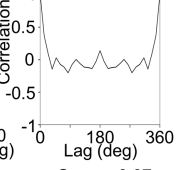

Agg score: -1.50

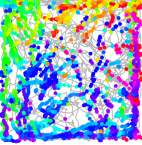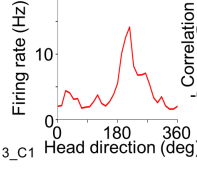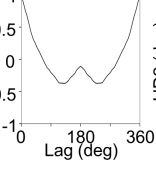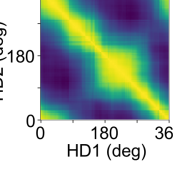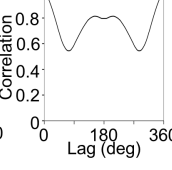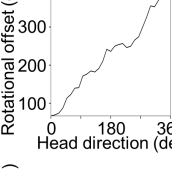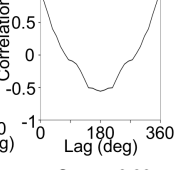

Agg score: -1.51

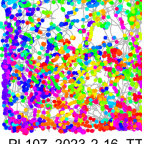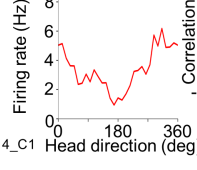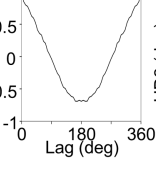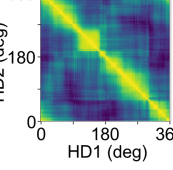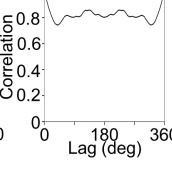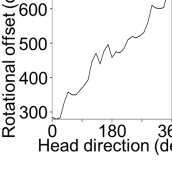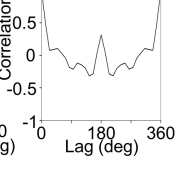



**Supplementary Figure 6. Symmetry analyses for example POR EB cells.** Directional spike plots, HD tuning curves, HD x location correlation matrices, and GLM-derived rotation functions (along with all associated autocorrelation functions) for ten example POR EB cells recorded in the square environment. Example cells were selected to illustrate a variety of directional preferences, with cells ordered from highest (*top*) to lowest (*bottom*) four-fold symmetry scores.

Trained in L-shape

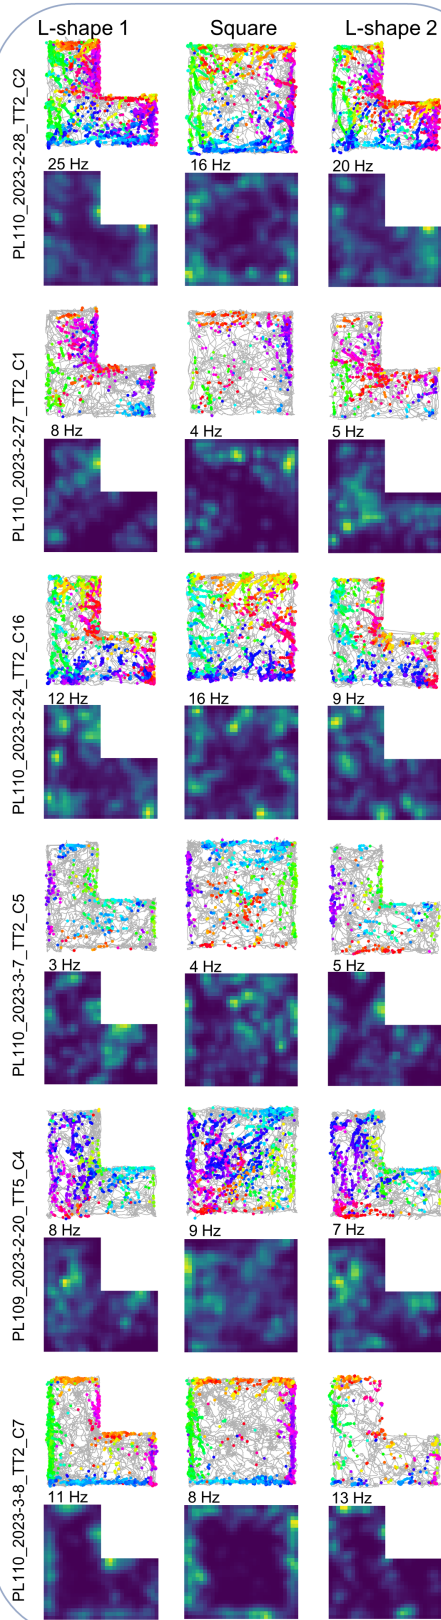

RSC EB cells

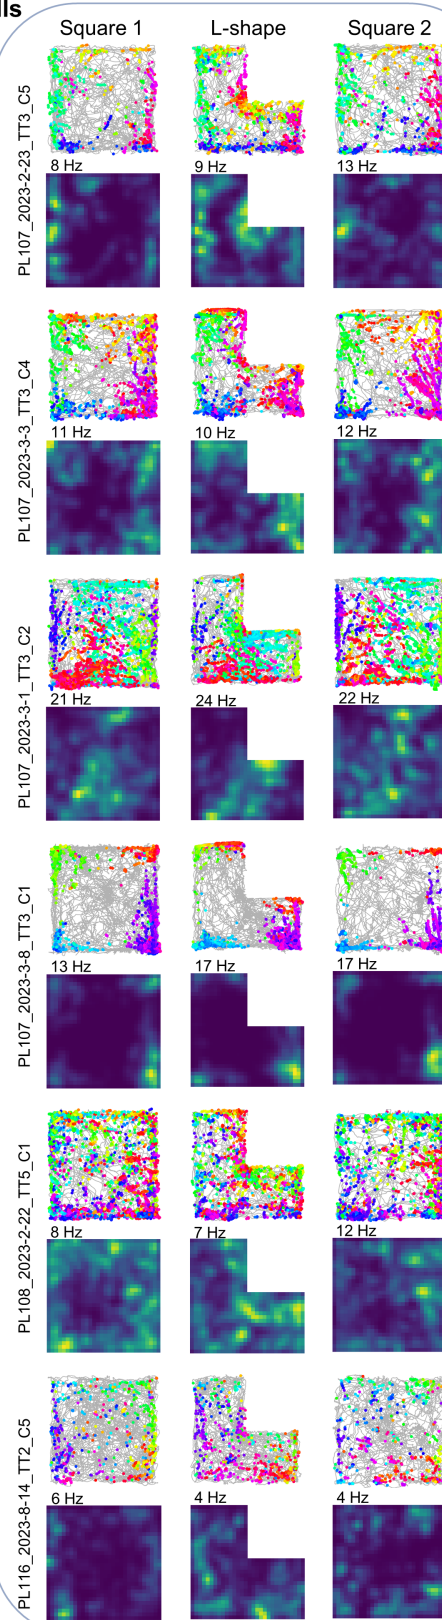

Trained in square

**Supplementary Figure 7. Example RSC EB cells in the L-shape experiment.** Directional spike plots and allocentric location firing rate maps for twelve example RSC EB cells recorded in the L-shape experiment, six from animals trained in the L-shape (*left*) and six from animals trained in the square (*right*).

Trained in L-shape

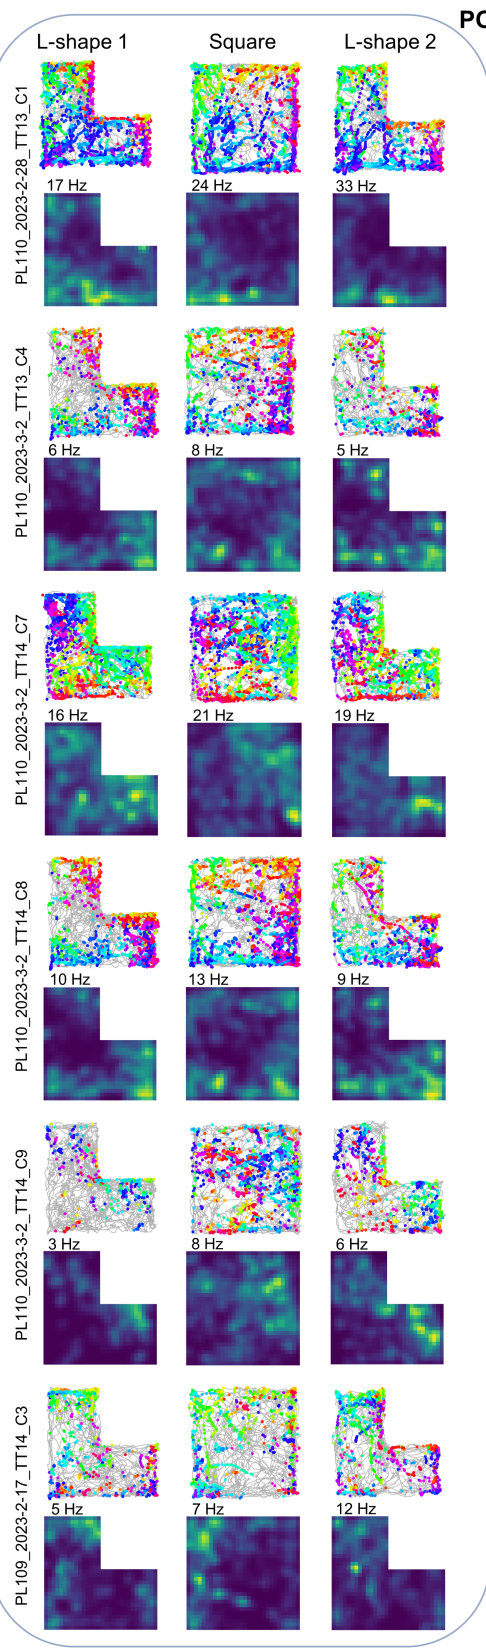

Trained in square

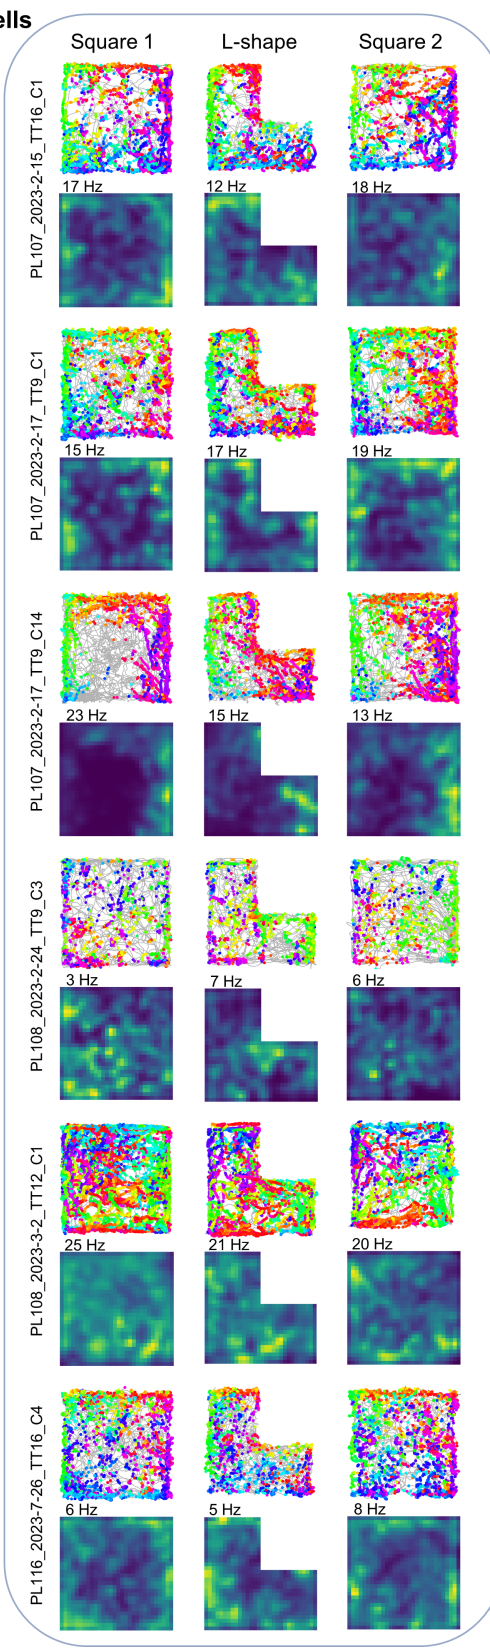

**Supplementary Figure 8. Example POR EB cells in the L-shape experiment.** Directional spike plots and allocentric location firing rate maps for twelve example POR EB cells recorded in the L-shape experiment, six from animals trained in the L-shape (*left*) and six from animals trained in the square (*right*).

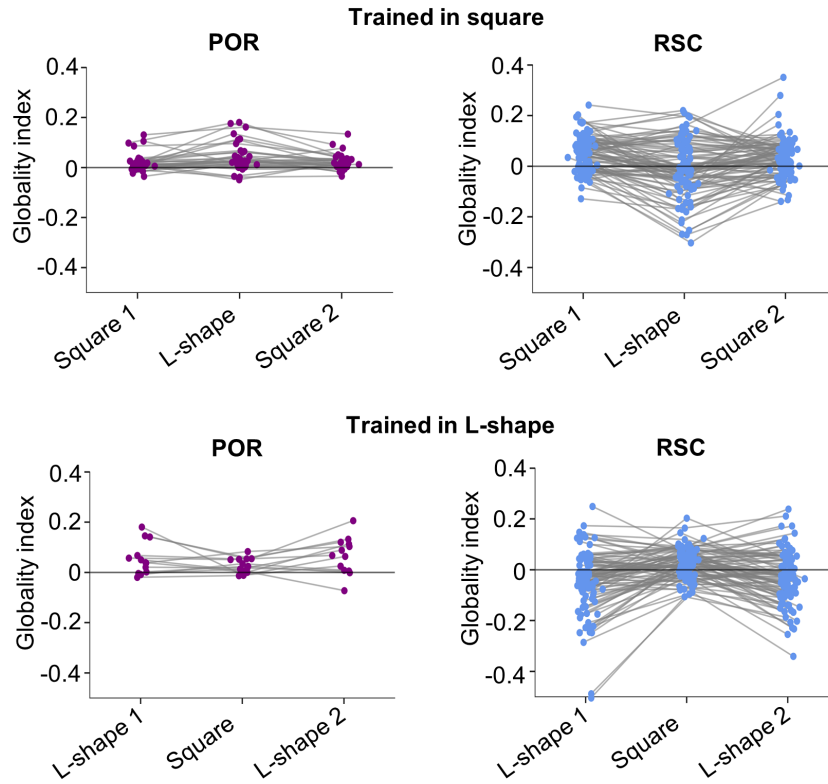

**Supplementary Figure 9. Local vs. global coding and habituation.** Globality indices derived from the local vs. global GLM analysis for all POR EB cells (*left*) and all RSC EB cells (*right*) recorded across all three sessions of the L-shape experiment, for animals initially trained in the square environment (*top*; POR: N = 33 cells, RSC: N = 89 cells) and those trained in the L-shaped environment (*bottom*; POR: N = 13 cells, RSC: N = 88 cells).



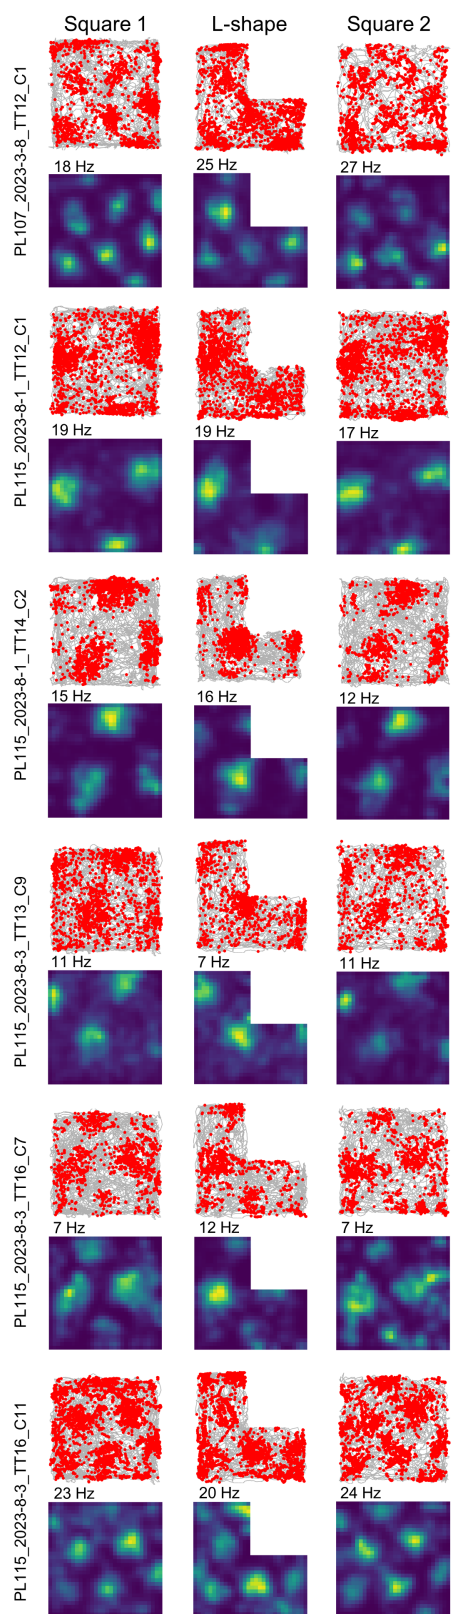

### MEC/PaS Grid cells

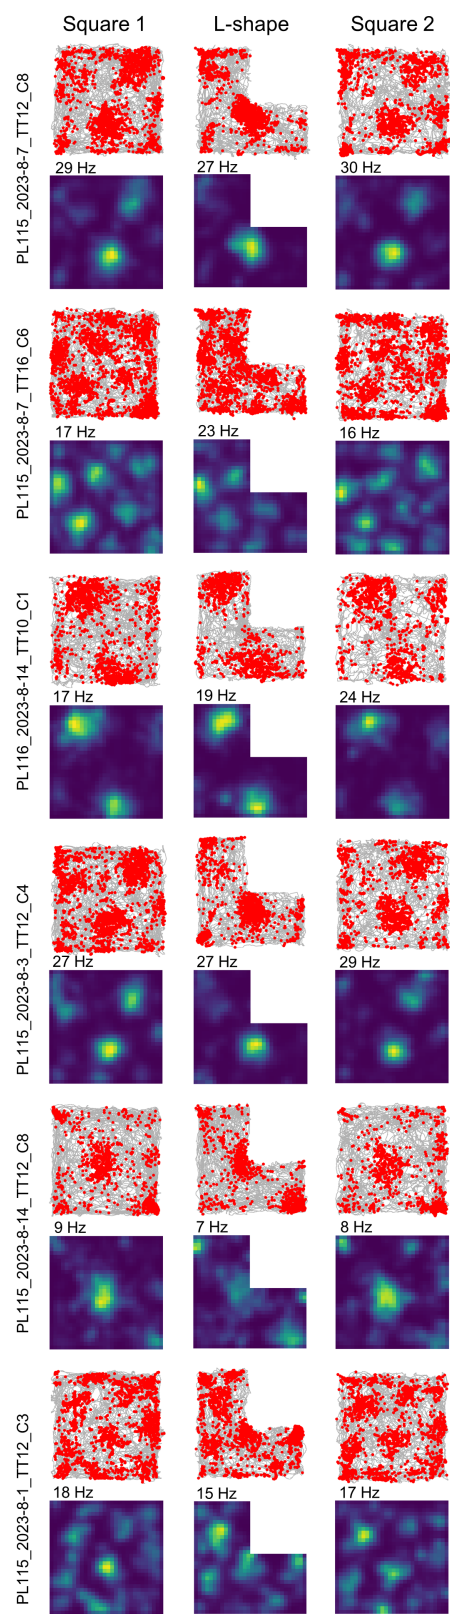

**Supplementary Figure 10. Grid cells in the L-shape experiment.** Path and spike plots and allocentric location firing rate maps for twelve example MEC/PaS grid cells recorded across all three sessions of the L-shape experiment (all grid cells came from animals trained in the square environment).



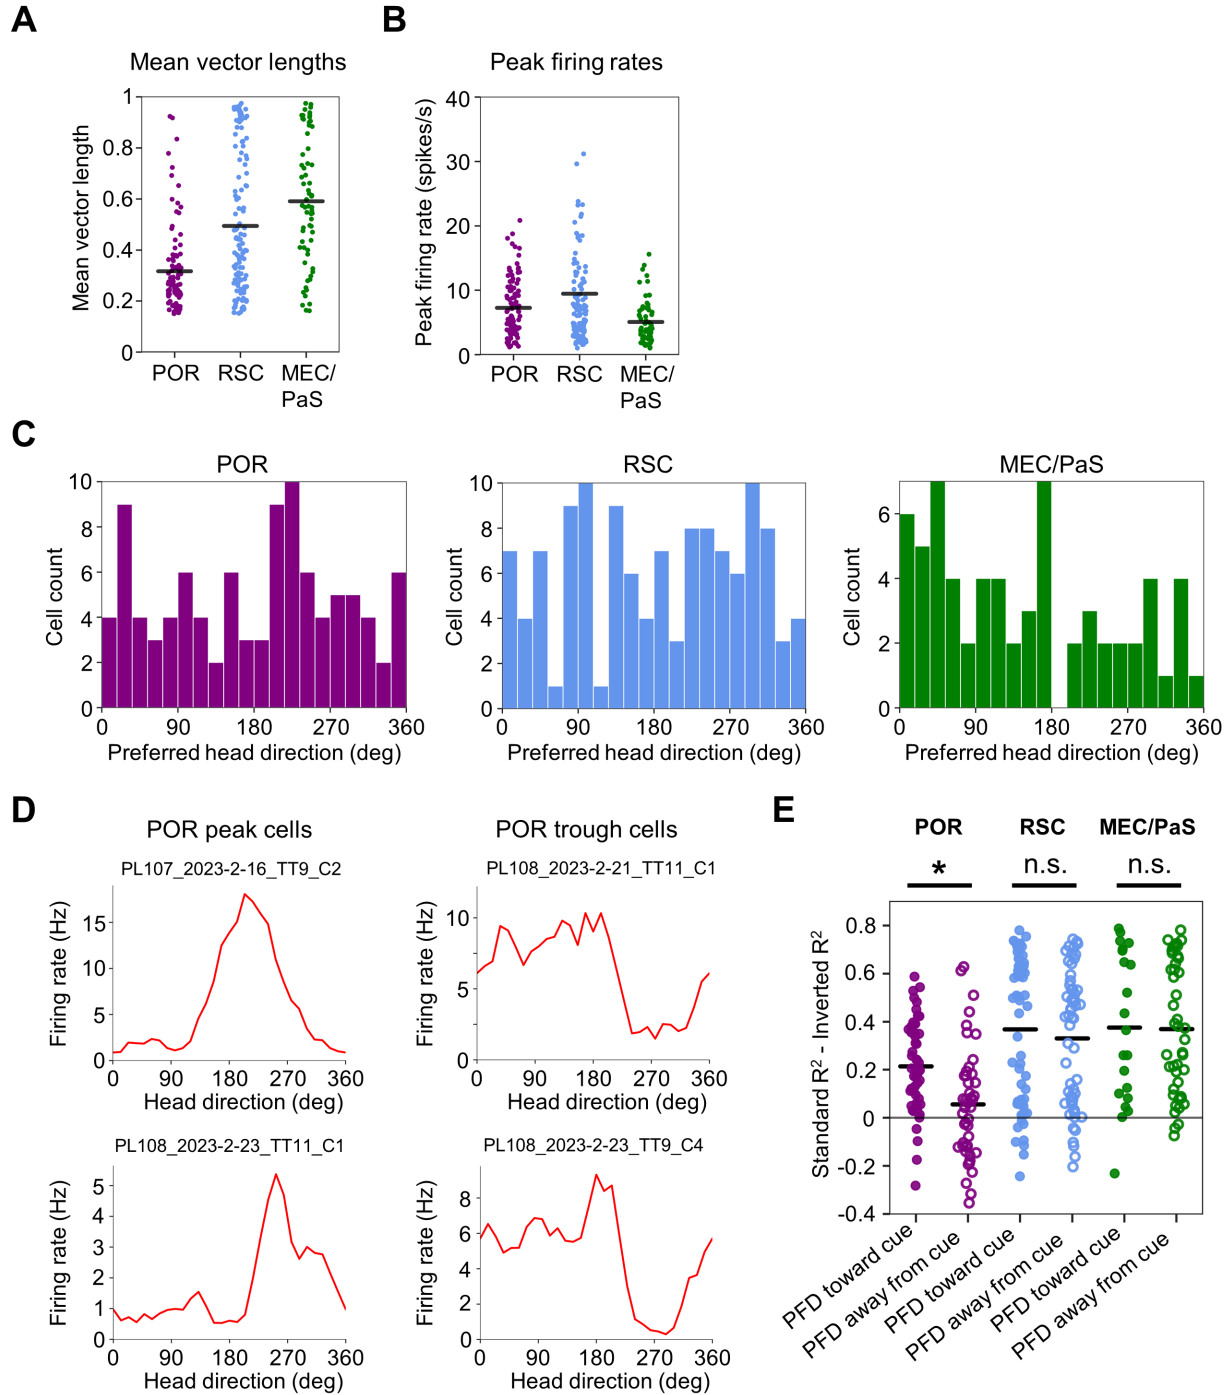

**Supplementary Figure 11. HD cell baseline firing properties.** A) Mean vector lengths for all POR (*left*; N = 97 cells), RSC (*middle*; N = 122 cells), and MEC/PaS (*right*; N = 65 cells) HD cells recorded in the square environment. B) Same as (A) but for peak firing rates. C) Histogram of preferred HDs for all POR (*left*), RSC (*middle*), and MEC/PaS (*right*) HD cells recorded in the square environment. D) Tuning curves for two example POR peak cells (*left*) and two example POR trough cells (*right*) recorded in the square environment. E) Difference between standard and inverted von Mises  $R^2$  values for HD cells in POR, RSC, and MEC/PaS, separated into HD cells with maximal firing rates oriented toward or away from the familiar landmark cue. Note

that only POR shows a significant distinction between these two types of HD cells (POR toward vs. away, two-sided Wilcoxon rank sum test,  $Z = 3.66$ ,  $P = 2.52\text{e-}4$ ; all other comparisons  $P > 0.05$ ).

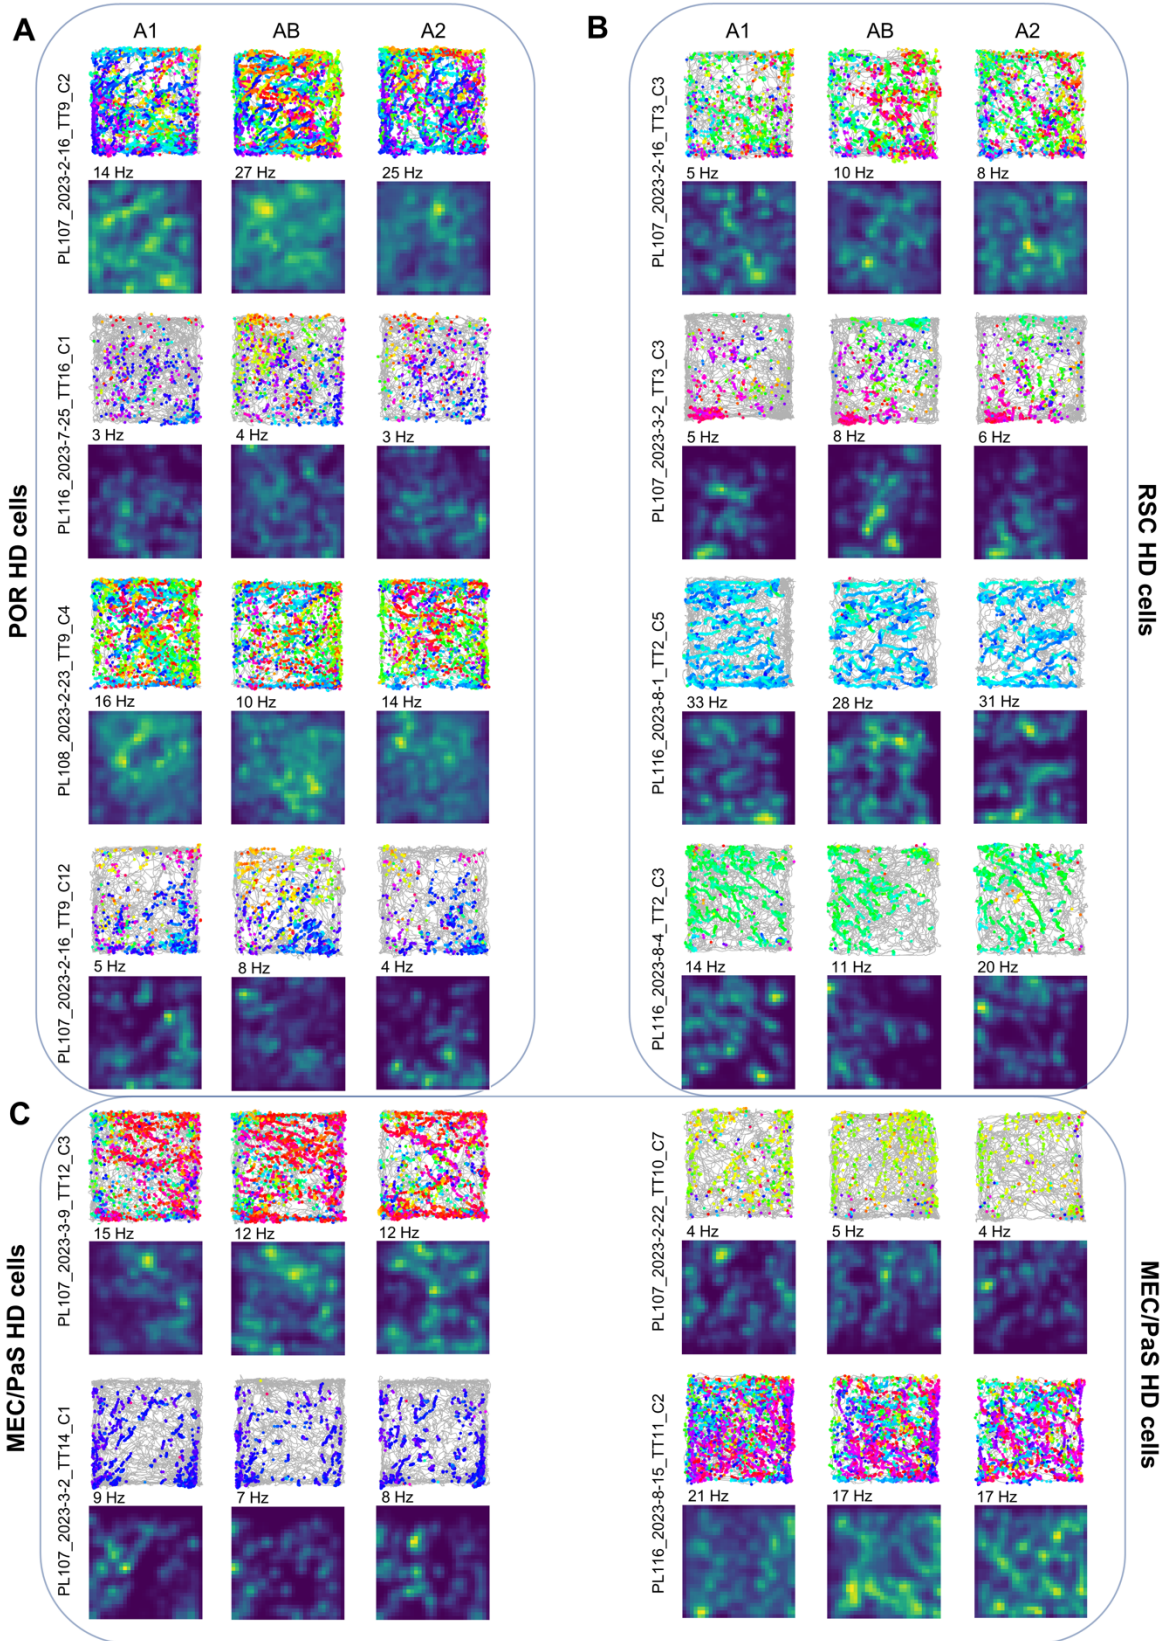

**Supplementary Figure 12. Location firing properties of HD cells in the AB experiment.** A) Directional spike plots and allocentric location firing rate maps for the four POR HD cells with tuning curves shown in Fig. 5A. B) Same as (A) but for the four RSC HD cells from Fig. 5B. C) Same as (A) but for the four MEC/PaS cells from Fig. 5C. Note that the POR HD cells and the top two RSC HD cells tend to show more bimodal distributions of HD colors in the AB condition.

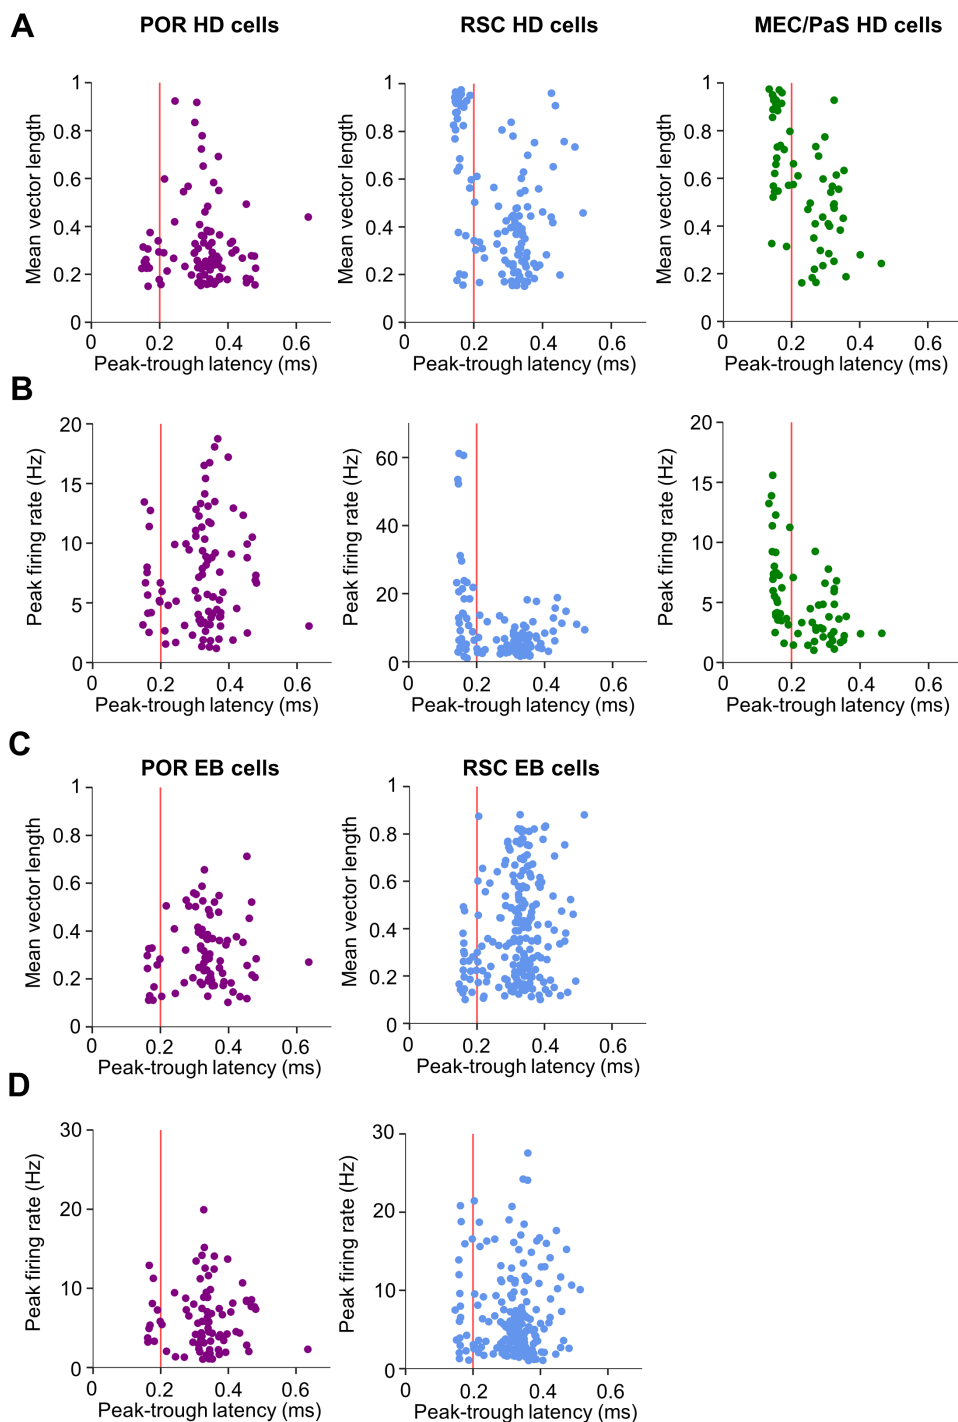

**Supplementary Figure 13. HD cell and EB cell firing properties according to waveform width.** A) Comparison between HD mean vector length and extracellular waveform width for all HD cells recorded in the square environment from POR (*left*;  $N = 97$  cells), RSC (*middle*;  $N = 122$  cells), and MEC/PaS (*right*;  $N = 65$  cells). MVLs were higher for narrow-waveform HD cells in RSC (two-sided Wilcoxon rank sums test,  $Z = 5.87$ ,  $P = 4.29\text{e-}9$ ) and MEC ( $Z = 5.05$ ,  $P = 4.32\text{e-}7$ ) but not POR ( $P > 0.05$ ) B) Same as (A) but for peak firing rates. Note that RSC (two-sided Wilcoxon rank sums test,  $Z = 4.16$ ,  $P = 3.22\text{e-}5$ ) and MEC/PaS ( $Z = 4.26$ ,  $P = 2.02\text{e-}5$ ) HD

cells with narrow waveforms tend to have higher mean vector lengths and peak firing rates (POR:  $P > 0.05$ ). C) Comparison between egocentric mean vector length and extracellular waveform width for all EB cells recorded in the square environment from POR (*left*; N = 85 cells) and RSC (*right*; N = 210 cells). D) Same as (C) but for peak firing rates. Note the lack of strong distinction between narrow and broad waveform EB cells in terms of mean vector lengths or peak firing rates, unlike HD cells.



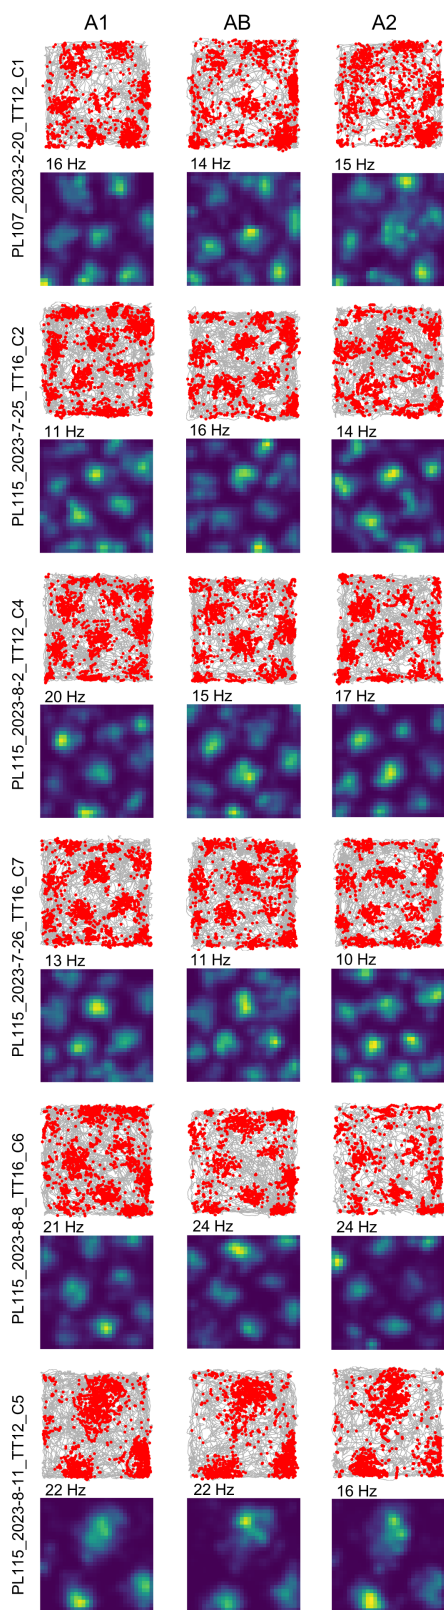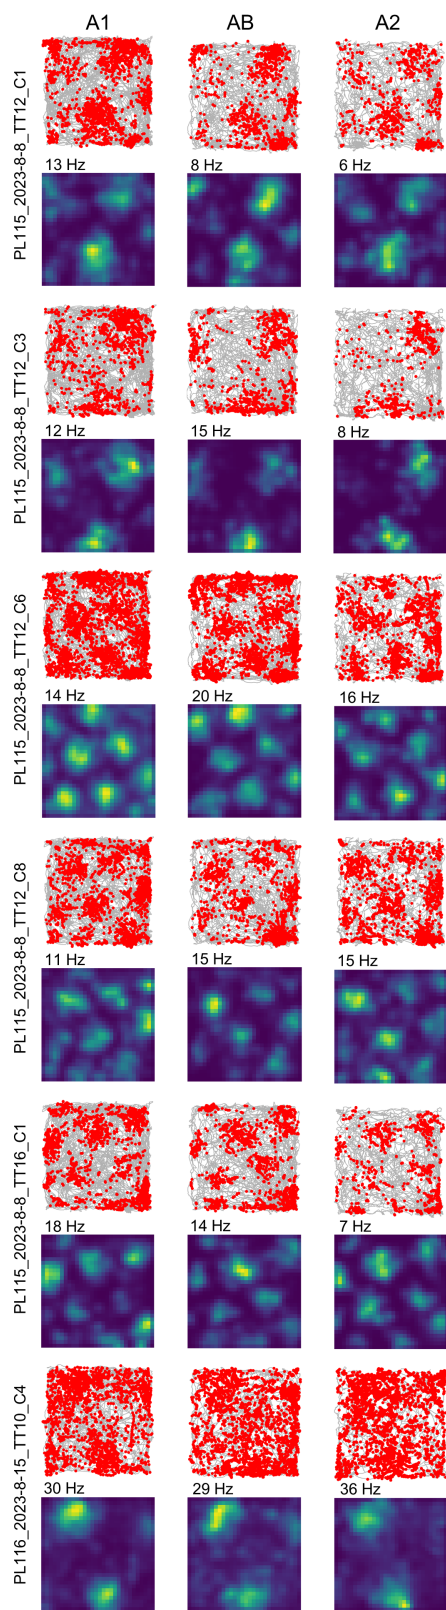

**Supplementary Figure 14. Grid cells in the AB experiment.** Path and spike plots and allocentric location firing rate maps for twelve example MEC/PaS grid cells recorded across the three sessions of the AB experiment. Note the strong consistency of grid cell firing patterns across sessions (N = 61 grid cells; A1-A2 rate map correlations vs. A1-AB correlations, two-sided Wilcoxon signed-rank test,  $W = 879$ ,  $P = 0.63$ ).



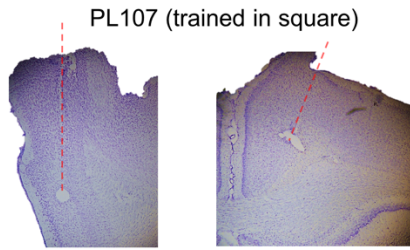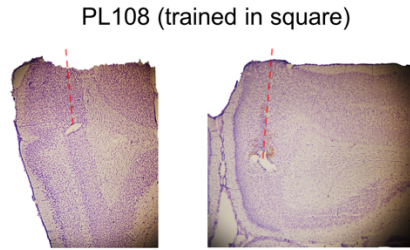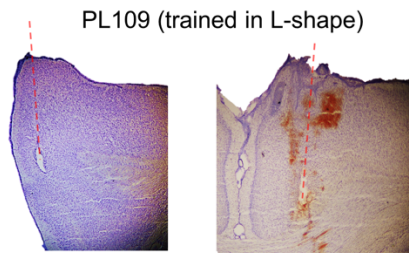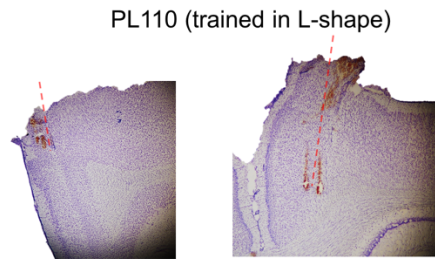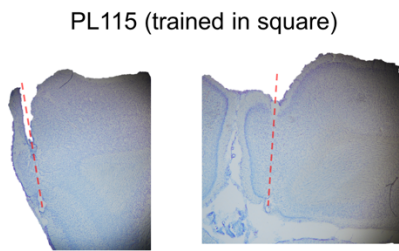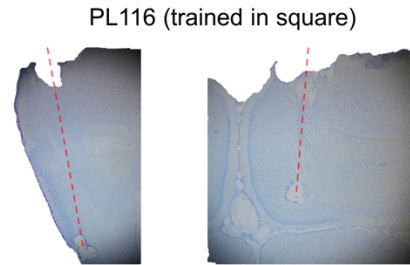

**Supplementary Figure 15. Histology.** Nissl-stained sagittal (*left*) and coronal (*right*) sections for all animals showing electrode tracks through regions of interest. Electrode tracks are indicated by a red dotted line.
